# Supplementary material for: Metformin Modulates Systemic Lipid Remodeling after Traumatic Brain Injury
Source: Research Square preprint supplement (doi:10.21203/rs.3.rs-9583079/v1), 2026-06-04
Supplement: Supplementary file 1 [file 3de43af11429ce84fa9080c1.docx]

**Supplementary Material**

1. Table S1. Significantly increased or decreased metabolites after TBI.
2. Table S2. Metabolites contributing to sparse partial least squares discriminant analysis (sPLS-DA) components considering pre-TBI samples
3. Table S3 Metabolites contributing to sparse partial least squares discriminant analysis (sPLS-DA) components considering post-TBI samples

| Metabolite | Post TBI | Pre-TBI | log2FC | q | neglog10q | Class | Up / Down |
| --- | --- | --- | --- | --- | --- | --- | --- |
| TG(18:1_18:1_20:3)_1 | 0.004822 | 0.001805 | 1.417951 | 1.15E-06 | 5.941052 | TG | Up |
| TG(18:0_18:2_22:4)_1 | 0.00343 | 0.001593 | 1.106522 | 2.92E-06 | 5.53517 | TG | Up |
| TG(18:0_18:1_22:4)_2 | 0.001439 | 0.000654 | 1.136864 | 3.46E-06 | 5.461353 | TG | Up |
| PS(20:3_20:4)_1 | 2.83E-06 | 1.22E-06 | 1.211129 | 5.05E-05 | 4.296709 | PS | Up |
| TG(18:1_20:1_22:4)_1 | 0.000341 | 0.000154 | 1.141463 | 9.08E-05 | 4.041914 | TG | Up |
| TG(18:1_18:2_20:3)_1 | 0.003349 | 0.001513 | 1.146364 | 9.84E-05 | 4.007005 | TG | Up |
| TG(18:1_20:4_22:4)_1 | 0.001143 | 0.000359 | 1.671736 | 0.000132 | 3.879755 | TG | Up |
| TG(18:1_18:2_22:4)_2 | 0.003917 | 0.001307 | 1.583851 | 0.000236 | 3.627272 | TG | Up |
| TG(17:1_18:1_20:3)_1 | 0.000134 | 6.17E-05 | 1.119429 | 0.000257 | 3.590743 | TG | Up |
| PI(18:0_18:2)_1 | 4.89E-05 | 0.000149 | -1.60517 | 0.000351 | 3.45494 | PI | Down |
| TG(20:1_20:4_22:4)_1 | 0.00014 | 3.19E-05 | 2.139189 | 0.000403 | 3.395126 | TG | Up |
| DG(15:0_25:6)_1 | 0.000105 | 3.60E-05 | 1.547519 | 0.000478 | 3.3203 | DG | Up |
| TG(18:1_18:1_22:4)_1 | 0.001085 | 0.000538 | 1.011744 | 0.000622 | 3.206419 | TG | Up |
| TG(18:1_20:3_22:4)_1 | 0.000316 | 0.000124 | 1.34944 | 0.000646 | 3.189566 | TG | Up |
| TG(20:4_18:0_22:5)_1 | 0.001244 | 0.000323 | 1.943395 | 0.000664 | 3.17757 | TG | Up |
| TG(16:0_18:1_22:4)_1 | 0.000591 | 0.00029 | 1.028558 | 0.000674 | 3.171211 | TG | Up |
| PE(18:1_18:1)_1 | 9.27E-06 | 4.34E-06 | 1.094534 | 0.000685 | 3.164436 | PE | Up |
| TG(18:1_18:1_20:4)_1 | 0.001814 | 0.000608 | 1.576216 | 0.000788 | 3.103474 | TG | Up |
| TG(18:2_18:2_22:4)_2 | 0.000404 | 0.000194 | 1.058733 | 0.000811 | 3.091086 | TG | Up |
| TG(16:0_18:1_20:4)_2 | 0.002341 | 0.000804 | 1.542597 | 0.000888 | 3.051489 | TG | Up |
| TG(18:0_18:2_22:4)_2 | 0.000209 | 9.83E-05 | 1.087048 | 0.000914 | 3.038911 | TG | Up |
| PI(18:0_18:1)_1 | 1.31E-05 | 3.86E-05 | -1.5611 | 0.000978 | 3.00975 | PI | Down |
| PI(16:0_18:2)_1 | 2.35E-05 | 8.62E-05 | -1.87709 | 0.001139 | 2.943476 | PI | Down |
| PI(16:0_18:1)_1 | 1.07E-05 | 2.69E-05 | -1.33816 | 0.001153 | 2.938208 | PI | Down |
| TG(40:6_17:0)_1 | 0.000103 | 4.86E-05 | 1.085224 | 0.001276 | 2.894217 | TG | Up |
| TG(17:0_18:1_22:4)_1 | 0.000192 | 8.22E-05 | 1.22149 | 0.001361 | 2.866174 | TG | Up |
| PC(20:4_20:4)_1 | 0.000392 | 0.000181 | 1.110849 | 0.001408 | 2.851552 | PC | Up |
| TG(18:0_18:1_20:4)_1 | 0.000884 | 0.000428 | 1.046452 | 0.001489 | 2.827105 | TG | Up |
| TG(18:1_20:3_20:4)_1 | 0.000128 | 5.86E-05 | 1.123273 | 0.001849 | 2.73304 | TG | Up |
| PE(16:0_18:1)_1 | 1.72E-05 | 7.70E-06 | 1.161867 | 0.001995 | 2.700122 | PE | Up |
| TG(18:2_20:4_22:4)_2 | 0.000708 | 0.000234 | 1.597992 | 0.002213 | 2.65494 | TG | Up |
| PC(20:4_20:4)_2 | 0.000381 | 0.000174 | 1.127176 | 0.00271 | 2.566967 | PC | Up |
| PI(18:1_18:2)_1 | 1.22E-05 | 3.27E-05 | -1.42532 | 0.003155 | 2.500973 | PI | Down |
| PI(18:0_18:3)_1 | 2.26E-06 | 9.76E-06 | -2.1126 | 0.003538 | 2.451254 | PI | Down |
| TG(18:0_18:1_22:3)_1 | 0.000245 | 0.000119 | 1.038229 | 0.00388 | 2.411202 | TG | Up |
| TG(16:0_18:2_20:3)_1 | 0.001033 | 0.000489 | 1.079249 | 0.004212 | 2.375491 | TG | Up |
| TG(18:1_20:4_20:4)_1 | 0.000386 | 0.000125 | 1.62965 | 0.005239 | 2.280768 | TG | Up |
| TG(18:1_18:1_20:6)_1 | 9.67E-05 | 3.93E-05 | 1.300494 | 0.00551 | 2.258888 | TG | Up |
| TG(18:1_18:1_22:5)_2 | 0.000382 | 0.000139 | 1.454801 | 0.006852 | 2.164195 | TG | Up |
| TG(16:0_18:0_20:4)_1 | 0.000211 | 0.000102 | 1.044454 | 0.007457 | 2.12743 | TG | Up |
| TG(16:2_18:1_22:4)_1 | 0.000841 | 0.000403 | 1.062014 | 0.007599 | 2.119221 | TG | Up |
| TG(20:3_20:4_22:5)_1 | 6.31E-05 | 1.92E-05 | 1.720115 | 0.007666 | 2.115437 | TG | Up |
| TG(18:1_20:4_22:5)_1 | 5.11E-05 | 1.92E-05 | 1.413925 | 0.009234 | 2.034624 | TG | Up |
| TG(18:2_20:4_22:4)_3 | 4.79E-05 | 1.63E-05 | 1.558934 | 0.010429 | 1.981774 | TG | Up |
| TG(40:6_22:4)_1 | 9.35E-05 | 3.94E-05 | 1.247143 | 0.011696 | 1.931959 | TG | Up |
| TG(16:0_18:2_20:4)_1 | 0.001279 | 0.000519 | 1.299806 | 0.011991 | 1.921148 | TG | Up |
| TG(18:1_18:1_20:6)_2 | 0.000107 | 3.96E-05 | 1.439042 | 0.012537 | 1.901799 | TG | Up |
| TG(16:0_17:1_20:4)_1 | 4.56E-05 | 1.90E-05 | 1.262505 | 0.018619 | 1.730051 | TG | Up |
| TG(17:0_18:1_20:4)_1 | 7.07E-05 | 3.02E-05 | 1.227628 | 0.018705 | 1.728049 | TG | Up |
| TG(20:3_18:2_22:5)_1 | 0.000182 | 7.96E-05 | 1.194156 | 0.019198 | 1.716746 | TG | Up |
| TG(16:0_18:1_20:3)_1 | 0.000544 | 0.000239 | 1.185051 | 0.019199 | 1.716717 | TG | Up |
| TG(18:2_20:4_20:4)_1 | 0.000187 | 6.51E-05 | 1.524766 | 0.020396 | 1.690466 | TG | Up |
| TG(16:0_16:1_20:4)_1 | 0.000251 | 0.000123 | 1.027642 | 0.028187 | 1.549948 | TG | Up |
| TG(16:0_20:3_22:5)_1 | 0.000126 | 5.36E-05 | 1.236468 | 0.038578 | 1.413656 | TG | Up |
| TG(18:1_18:2_20:4)_1 | 0.001566 | 0.000779 | 1.008231 | 0.040708 | 1.390318 | TG | Up |
| TG(18:0_16:2_18:3)_1 | 7.96E-05 | 3.59E-05 | 1.148682 | 0.041147 | 1.385666 | TG | Up |
| TG(16:0_16:0_20:4)_1 | 0.000215 | 0.000101 | 1.090487 | 0.046944 | 1.328417 | TG | Up |
| TG(18:1_18:2_20:2)_3 | 0.000432 | 0.000176 | 1.291171 | 0.049851 | 1.30233 | TG | Up |

Table S1. Differentially abundant lipid species following traumatic brain injury. Shown are lipid metabolites exhibiting significant paired differences between post-TBI and pre-TBI plasma samples. For each metabolite, mean normalized abundance in post-TBI and pre-TBI samples, log₂ fold change (post/pre), false discovery rate–adjusted q-value, and −log₁₀(q) are reported. Lipid class annotation and direction of change (Up or Down) are indicated. Significance was assessed using paired Wilcoxon signed-rank testing with FDR correction.

| **Metabolite** | **Comp1** | **Comp2** |
| --- | --- | --- |
| PE(O-16:1_22:4)_1 | -0.60981 | 0 |
| PE(P-18:0_22:4)_1 | -0.3804 | 0 |
| SM(d38:1)_1 | -0.36425 | 0 |
| PI(18:1_20:4)_1 | -0.24673 | 0 |
| PE(O-16:1_22:5)_1 | -0.21956 | 0 |
| TG(18:1_20:3_22:4)_2 | 0.189544 | 0.563295 |
| PE(18:0_22:5)_1 | -0.18863 | 0 |
| PC(20:2_20:4)_1 | -0.17885 | 0 |
| PE(18:0_22:4)_1 | -0.17449 | 0 |
| PE(O-18:1_22:4)_1 | -0.16405 | 0 |
| PC(18:1_20:4)_1 | -0.15687 | 0 |
| PE(18:1_20:4)_1 | -0.15006 | 0 |
| PC(16:1_18:2)_1 | -0.1034 | 0 |
| PC(O-16:0_20:4)_3 | -0.08132 | -0.18305 |
| ChE(22:4)_2 | -0.07974 | 0 |
| LPE(22:6)_2 | -0.0627 | 0 |
| SM(d34:1)_1 | -0.05017 | -0.30792 |
| PS(20:3_20:4)_1 | -0.04036 | 0 |
| PC(16:0_20:2)_1 | -0.03478 | 0 |
| TG(19:2_4:0)+OO:(s)_1 | -0.02707 | 0 |

Table S2. Metabolites contributing to sparse partial least squares discriminant analysis (sPLS-DA) components considering pre-TBI samples. Shown are metabolites selected by the sPLS-DA model with corresponding loadings on component 1 (Comp1) and component 2 (Comp2). Negative and positive loadings indicate relative association with the respective class along each component.

| **Metabolite** | **Comp1** | **Comp2** |
| --- | --- | --- |
| TG(18:3_18:1_24:4)_1 | 0.302244 | 0 |
| TG(18:1_18:2_24:4)_1 | 0.28994 | 0 |
| PE(O-16:1_18:2)_1 | 0.238021 | 0 |
| TG(18:2_20:3_22:4)_1 | 0.222016 | 0 |
| PE(18:0_22:5)_1 | 0.205399 | 0 |
| PC(16:0_22:4)_2 | -0.20025 | -0.01557 |
| TG(18:2_18:2_22:4)_1 | 0.193552 | 0 |
| PC(14:0_16:0)_1 | 0.189361 | 0 |
| LPC(17:0)_1 | 0.187669 | 0 |
| TG(18:1_18:2_22:5)_2 | 0.181884 | 0 |
| PE(P-18:1_18:2)_1 | 0.175394 | 0 |
| LPC(14:0)_1 | 0.165682 | 0 |
| PE(O-18:2_18:2)_1 | 0.155183 | 0 |
| ChE(18:3)_1 | -0.15509 | 0 |
| PE(O-16:1_18:1)_1 | 0.154528 | 0 |
| TG(20:0_18:2_20:2)_1 | 0.154398 | 0 |
| TG(18:1_18:2_22:4)_1 | 0.150808 | 0 |
| ChE(22:5)_4 | -0.13413 | 0 |
| TG(18:1_18:2_20:4)_1 | 0.132525 | 0 |
| PE(16:0_18:2)_1 | 0.130609 | 0 |

Table S3. Metabolites contributing to sparse partial least squares discriminant analysis (sPLS-DA) components considering post-TBI samples. Shown are metabolites selected by the sPLS-DA model with corresponding loadings on component 1 (Comp1) and component 2 (Comp2). Negative and positive loadings indicate relative association with the respective class along each component.
